# Supplementary material for: LFA-1 activates focal adhesion kinases FAK1/PYK2 to generate LAT-GRB2-SKAP1 complexes that terminate T-cell conjugate formation
Source: PubMed Central journal article supplement (PMC5510181; doi:10.1038/ncomms16001), 2017-07-12
Supplement: ncomms16001-s1.pdf [file ncomms16001-s1.pdf]

Title of file for HTML: Supplementary Information  
Description: Supplementary Figures

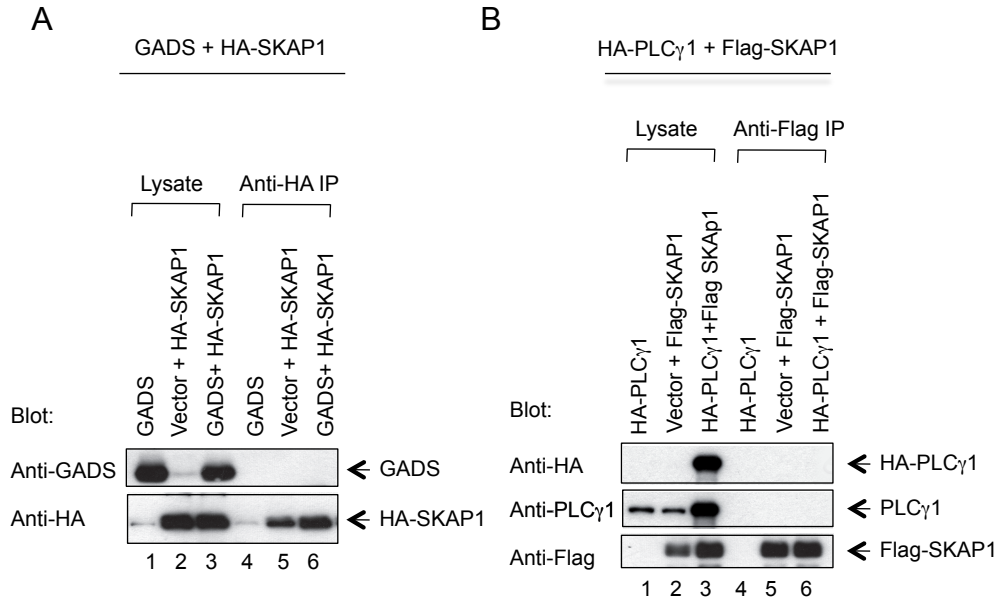

**Supplementary Figure 1.**

**(A) GADs does not bind to SKAP1.** 293T cells were transfected as above with GADs, HA-SKAP1 or both, followed by anti-HA precipitation and blotting with anti-GADs or anti-HA. Lanes 1-3: cell lysates; lanes 4-6: anti-HA precipitations. **(B) PLC $\gamma$ 1 does not bind to SKAP1.** 293T cells were transfected with HA-PLC $\gamma$ 1, FLAG-SKAP1 or both, followed by anti-Flag precipitation and blotting with anti-HA, anti-PLC $\gamma$ 1 or anti-Flag. Lanes 1-3: cell lysates; lanes 4-6: anti-Flag precipitations.

Figure 1C

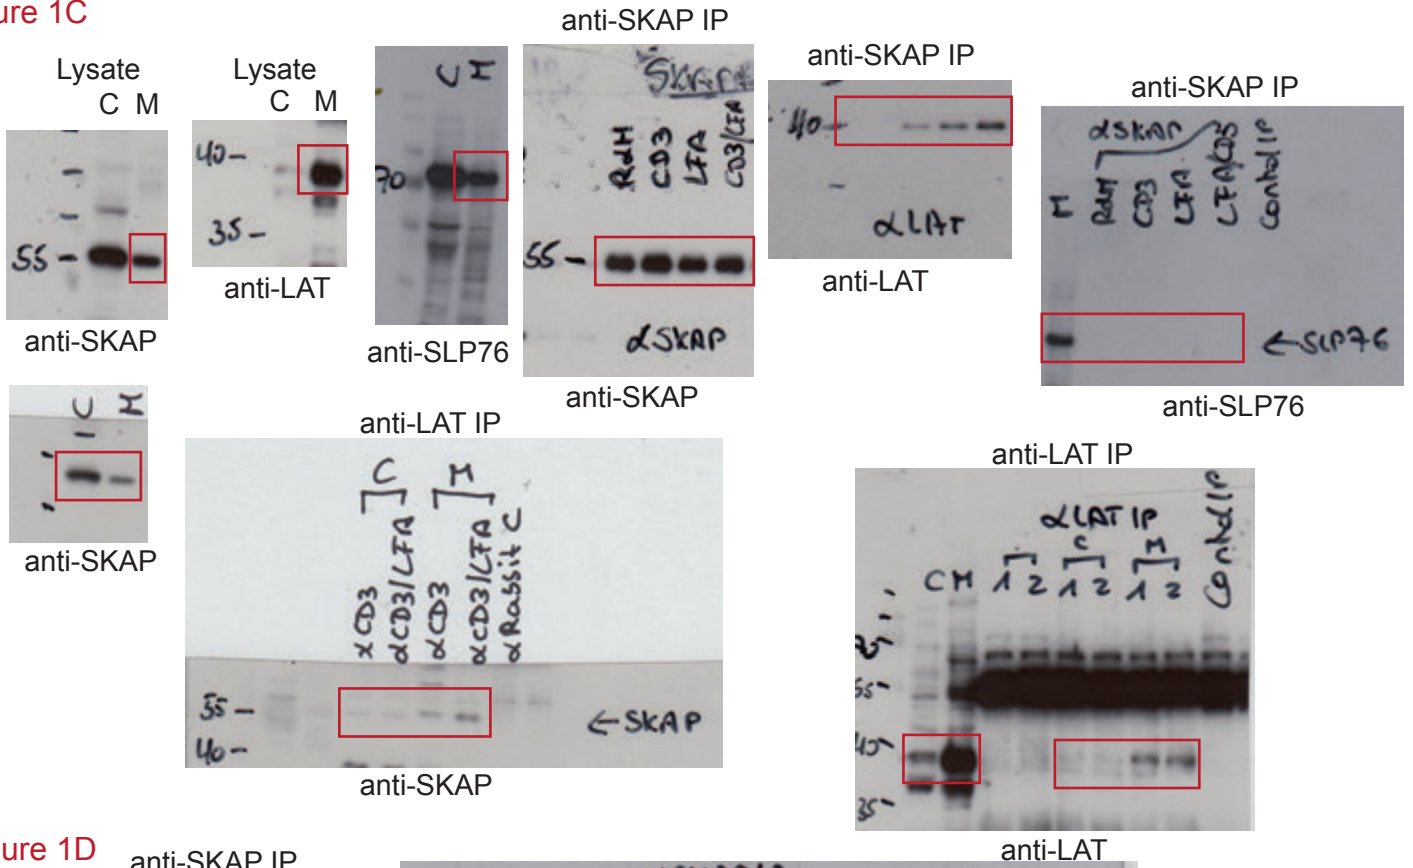

Figure 1D

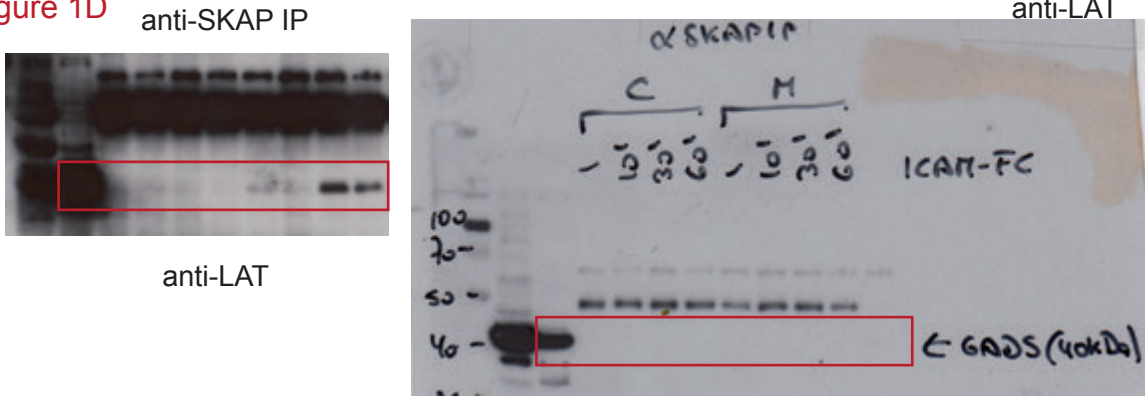

Figure 1D

Figure 1E

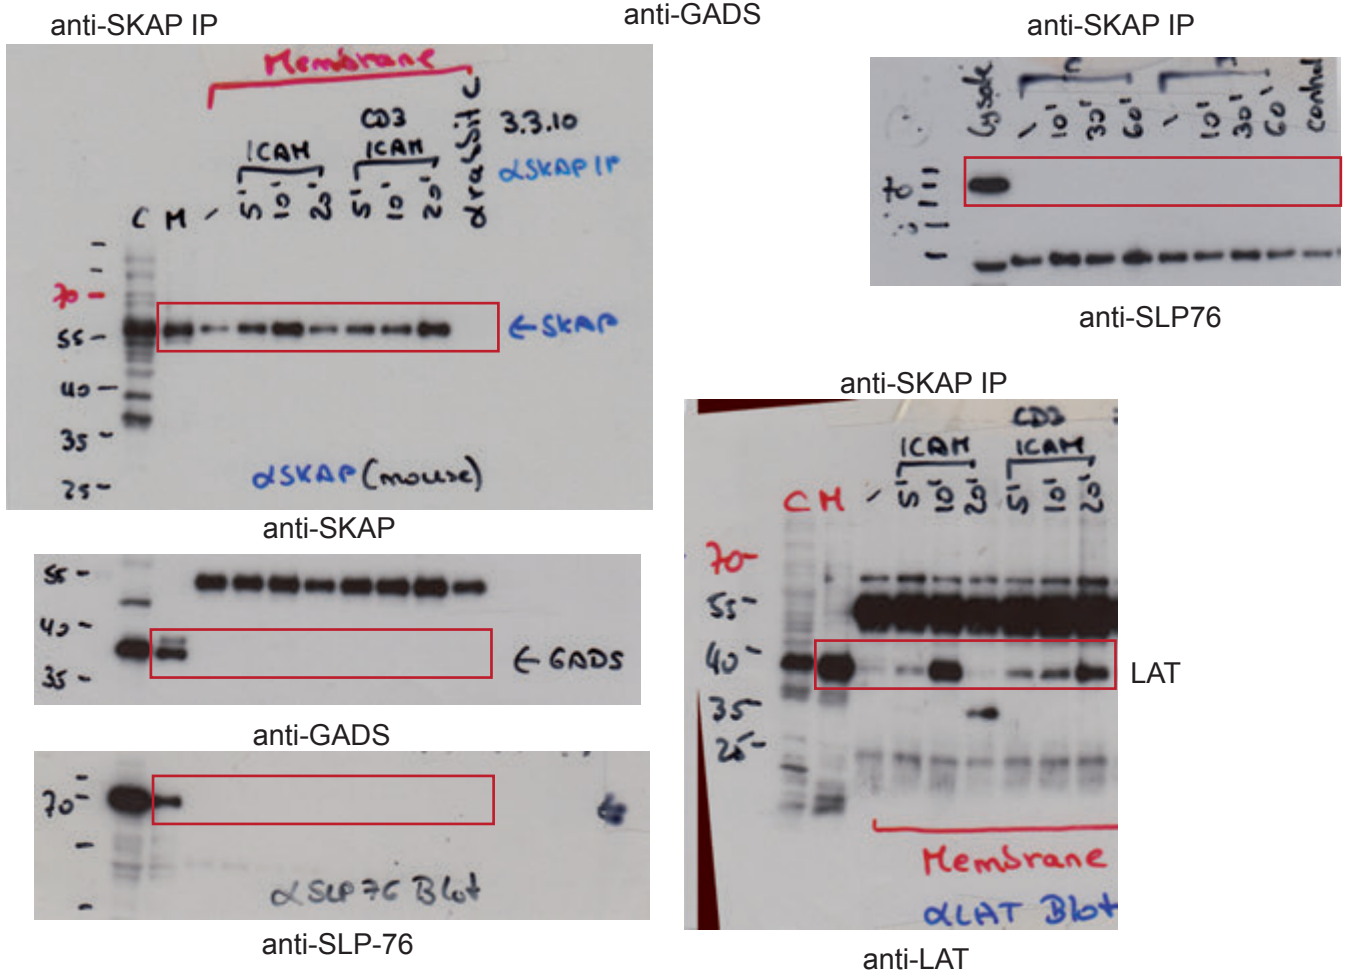

Figure 2 A

anti-SKAP IP

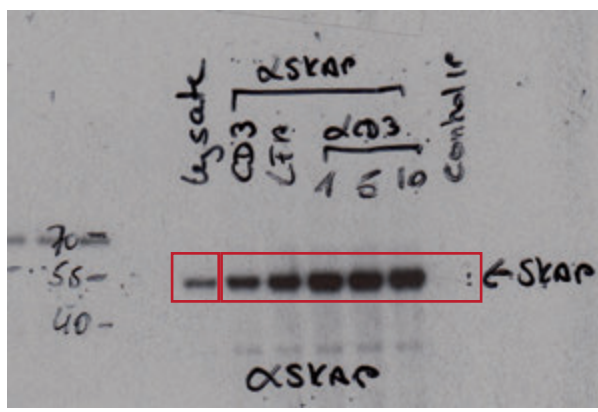

anti-SKAP1

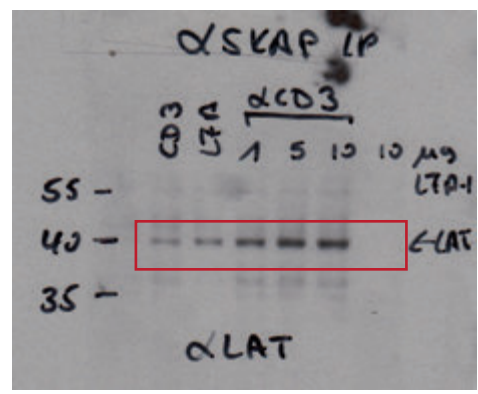

anti-LAT

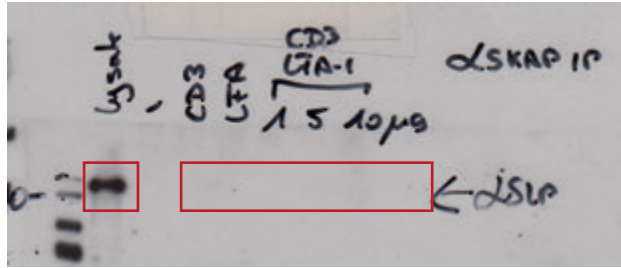

anti-SLP-76

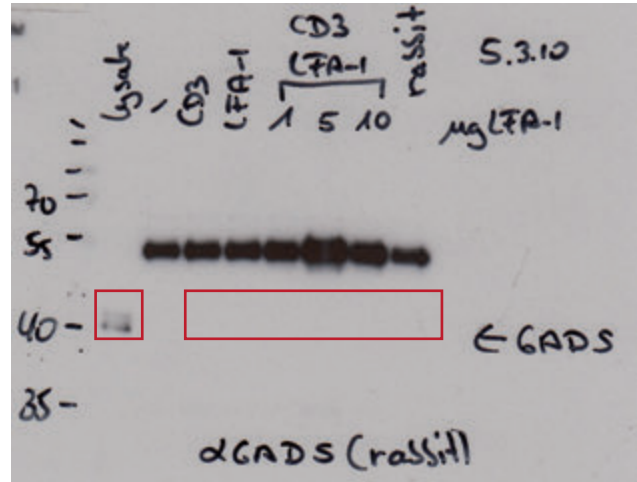

anti-GADS

Figure 2 B

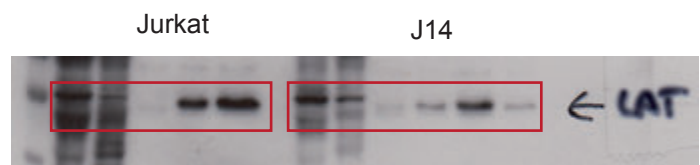

Jurkat

J14

anti-LAT

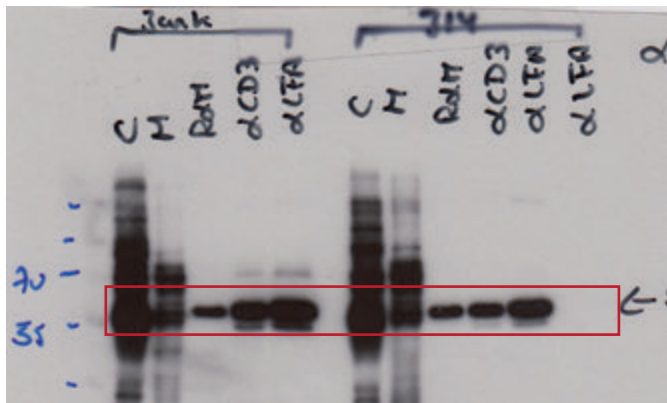

anti-SKAP1

Figure 2 C

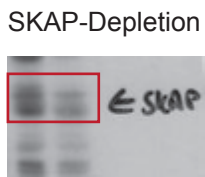

anti-SKAP1

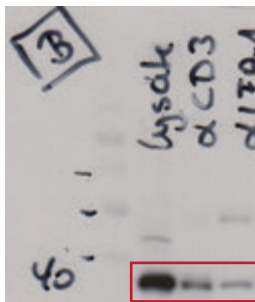

anti-SLP-76 IP

SKAP-Depletion

LAT

anti-LAT

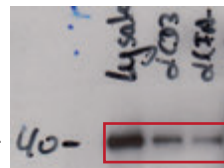

Figure 2 D

SLP-76 Depletion

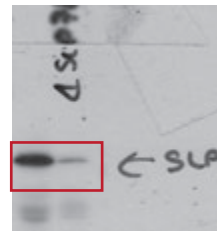

anti-SLP-76

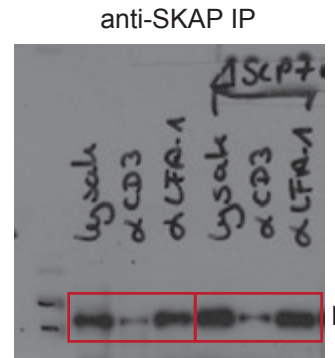

anti-LAT

Figure 2 E

SKAP-Depletion

anti-SKAP1 IP

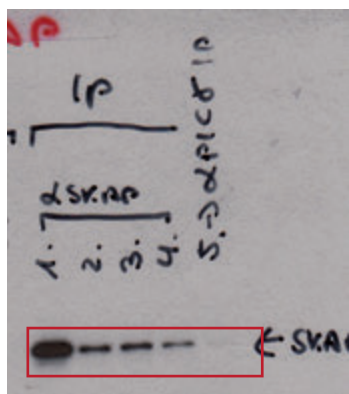

anti-SKAP1

anti-SKAP IP

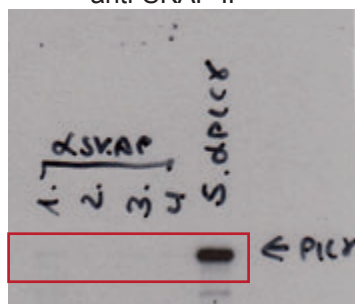

anti-PLCg

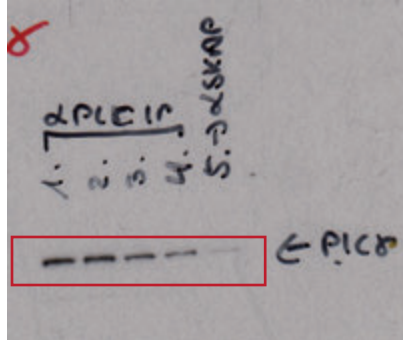

anti-PLCg

PLCg-Depletion

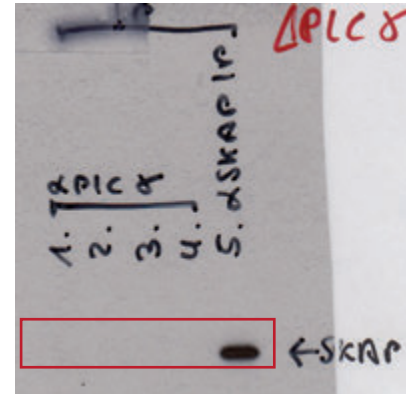

anti-SKAP1



Figure 2 F

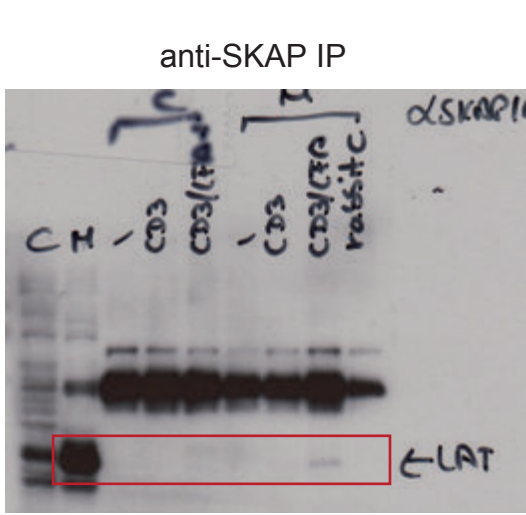

anti-LAT

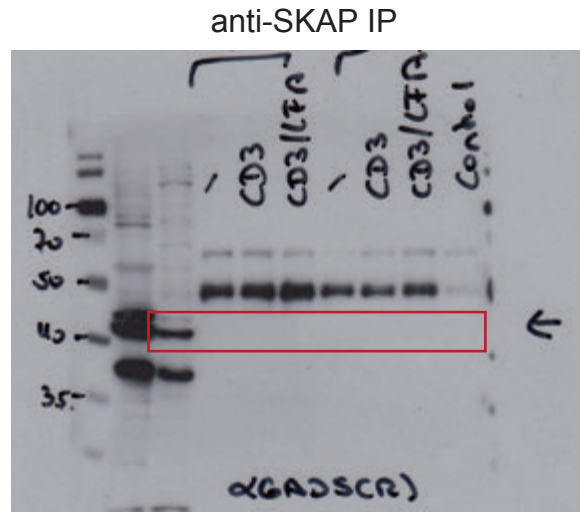

anti-GAD55

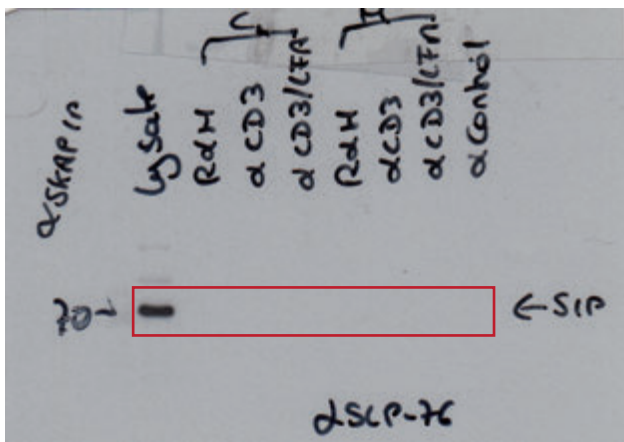

anti-SLP-76

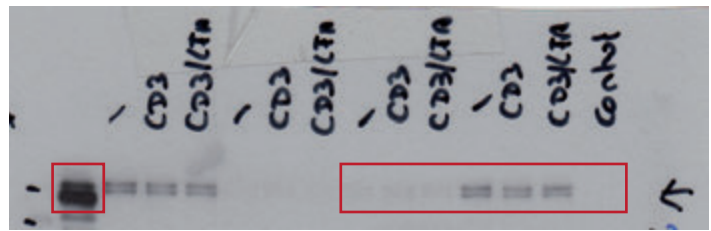

anti-ADAP

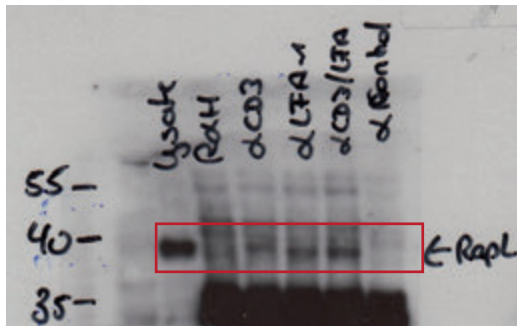

Figure 3 A

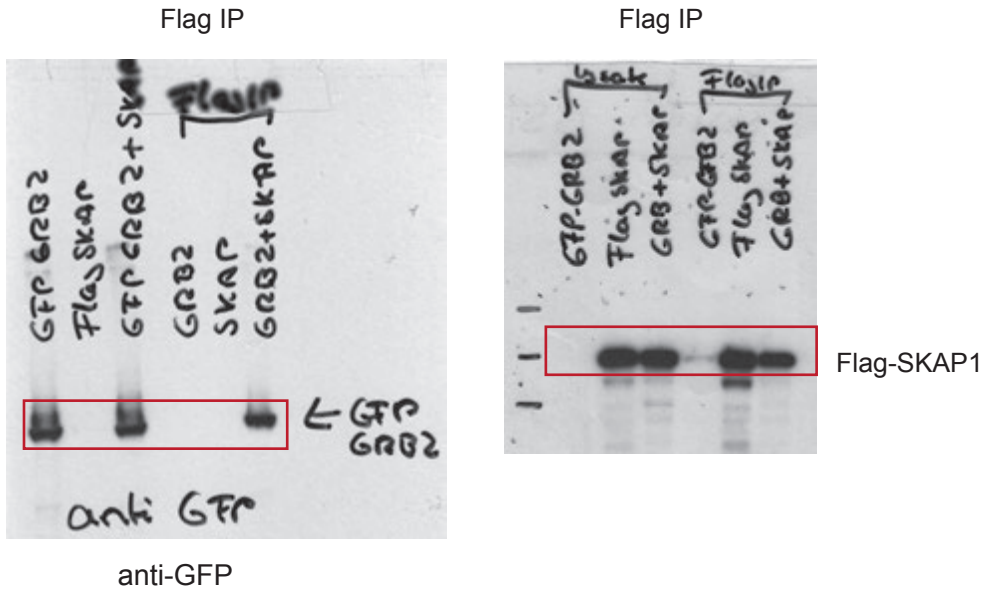

Figure 3 B

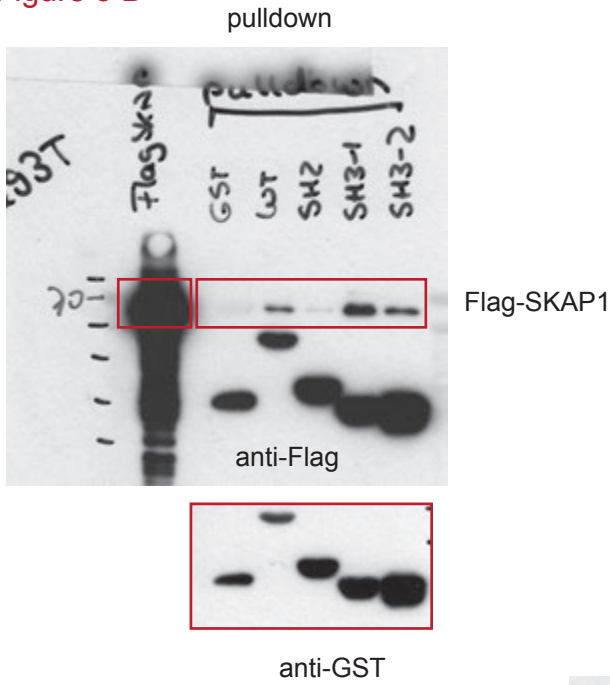

Figure 3 C

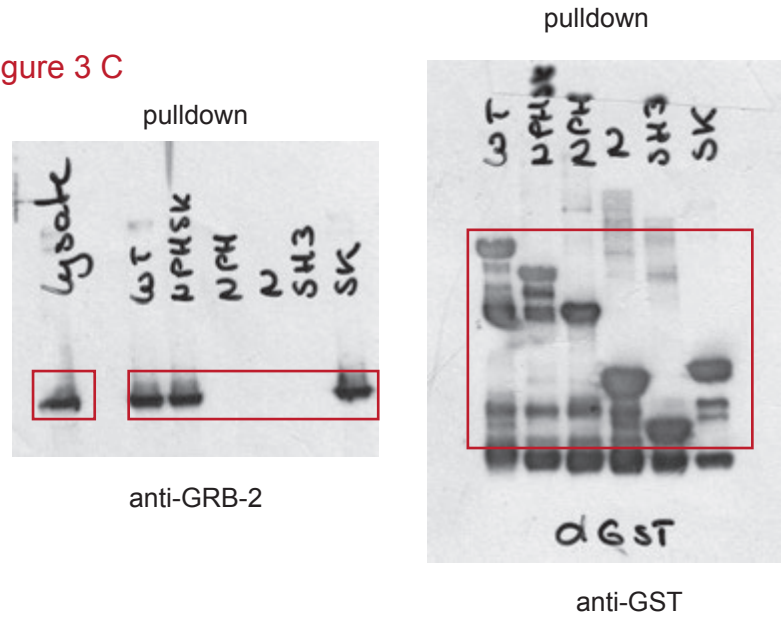

Figure 3 D

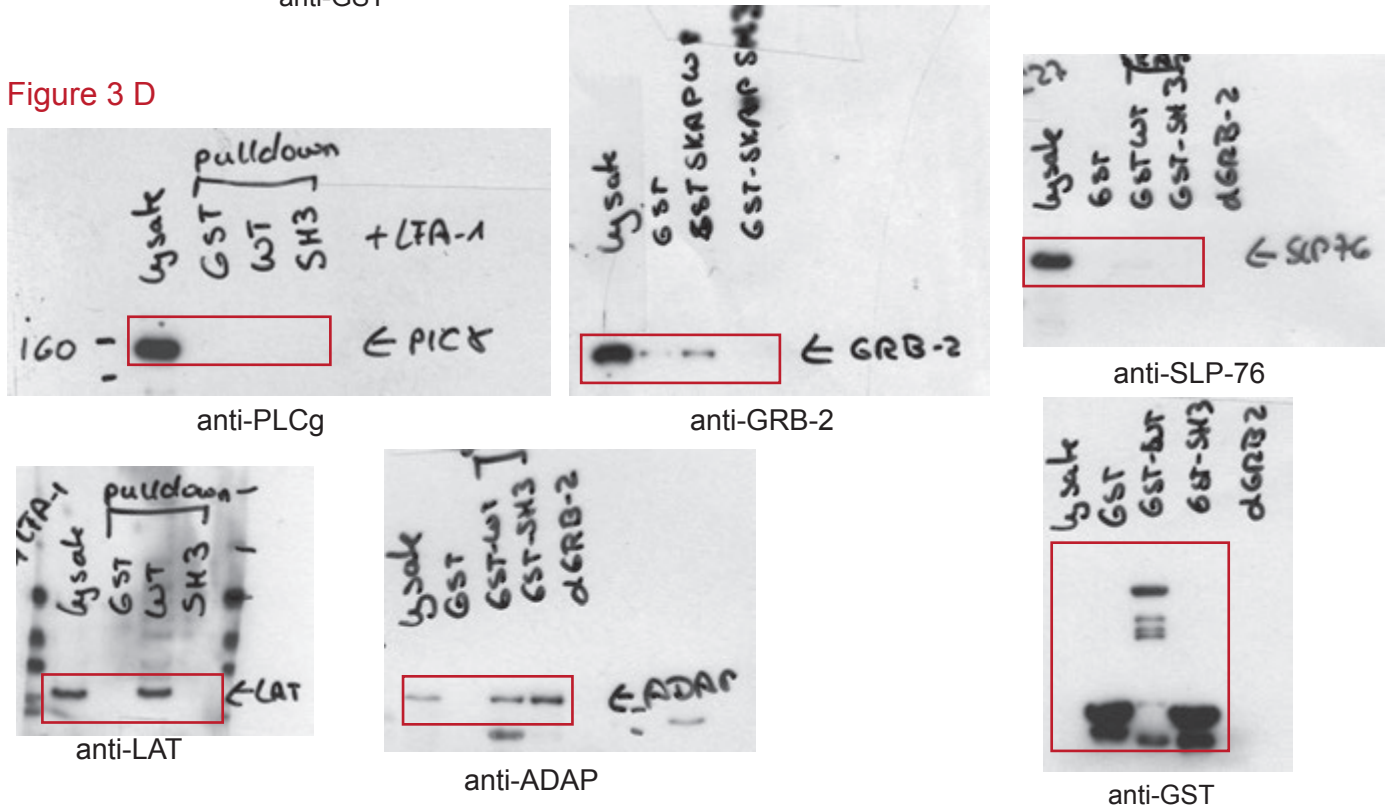

Figure 4 A Time kinetic (membrane)

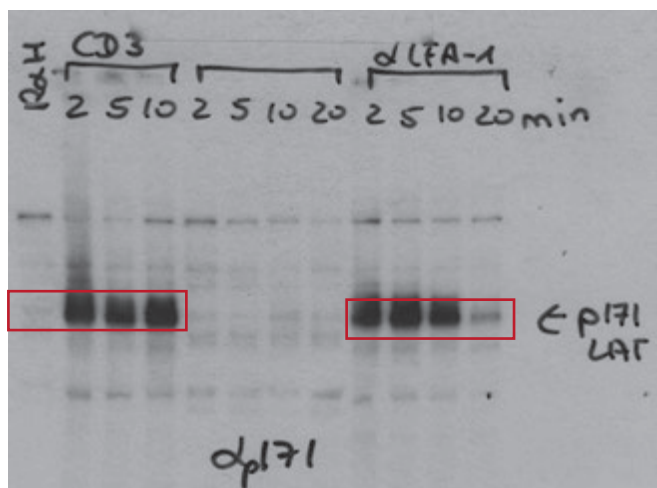

anti-p171-LAT

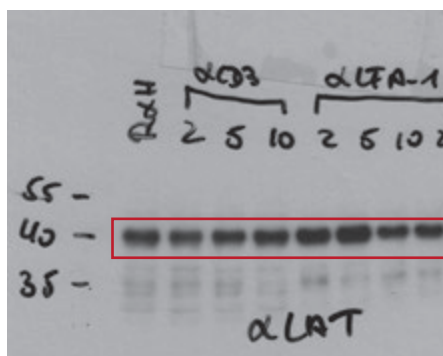

anti-LAT

Figure 4 B anti-LFA-1 IP

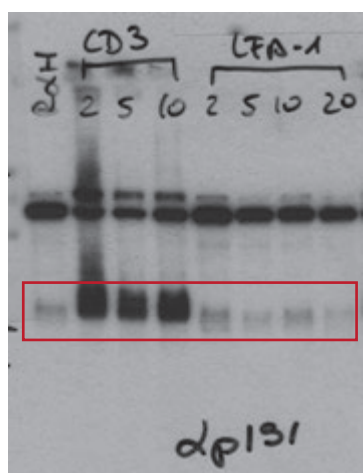

anti-p191-LAT

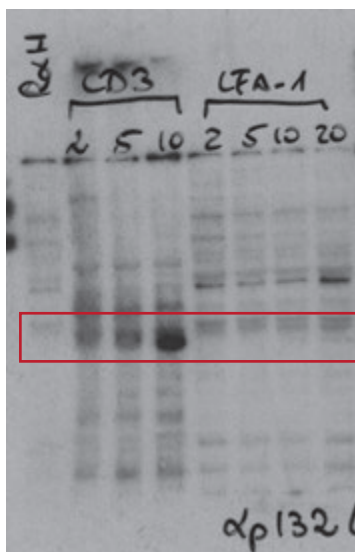

anti-p132-LAT

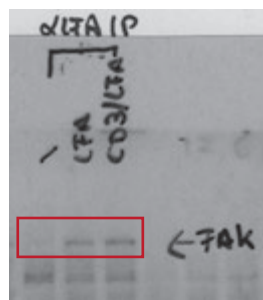

anti-FAK1

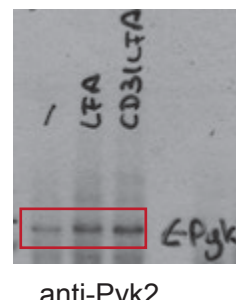

anti-Pyk2

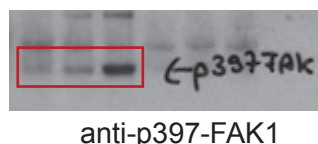

anti-p397-FAK1

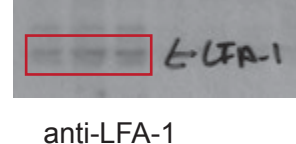

anti-LFA-1

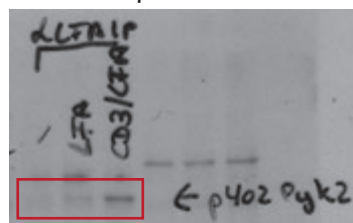

anti-p402-Pyk2

Figure 4 C

Kinase Assay

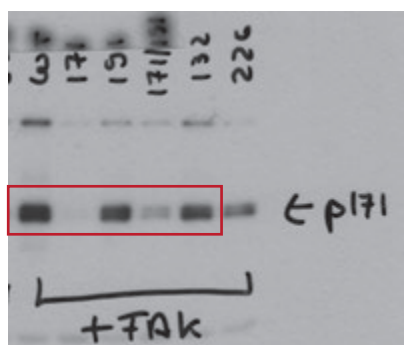

anti-p171-LAT

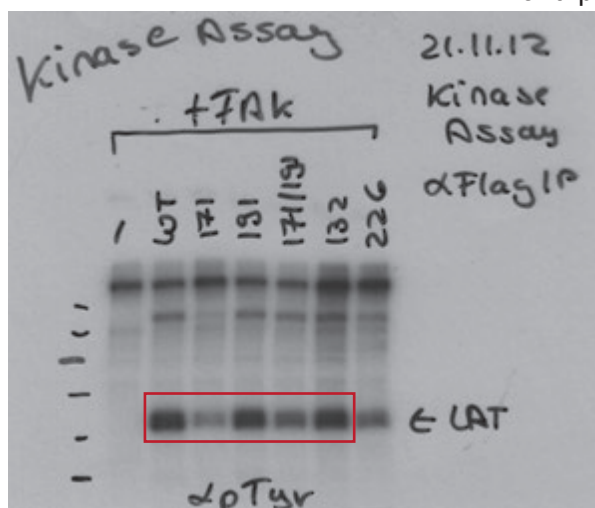

anti-pTyr

Lysate

anti-Flag IP

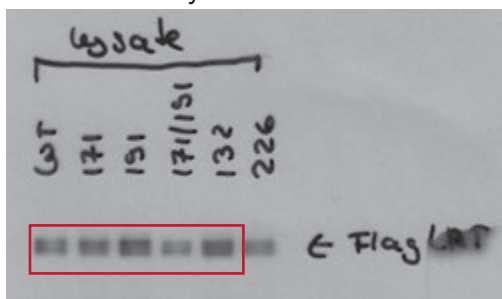

anti-Flag

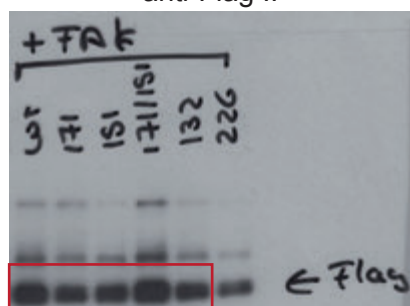

anti-Flag



Figure 4 D

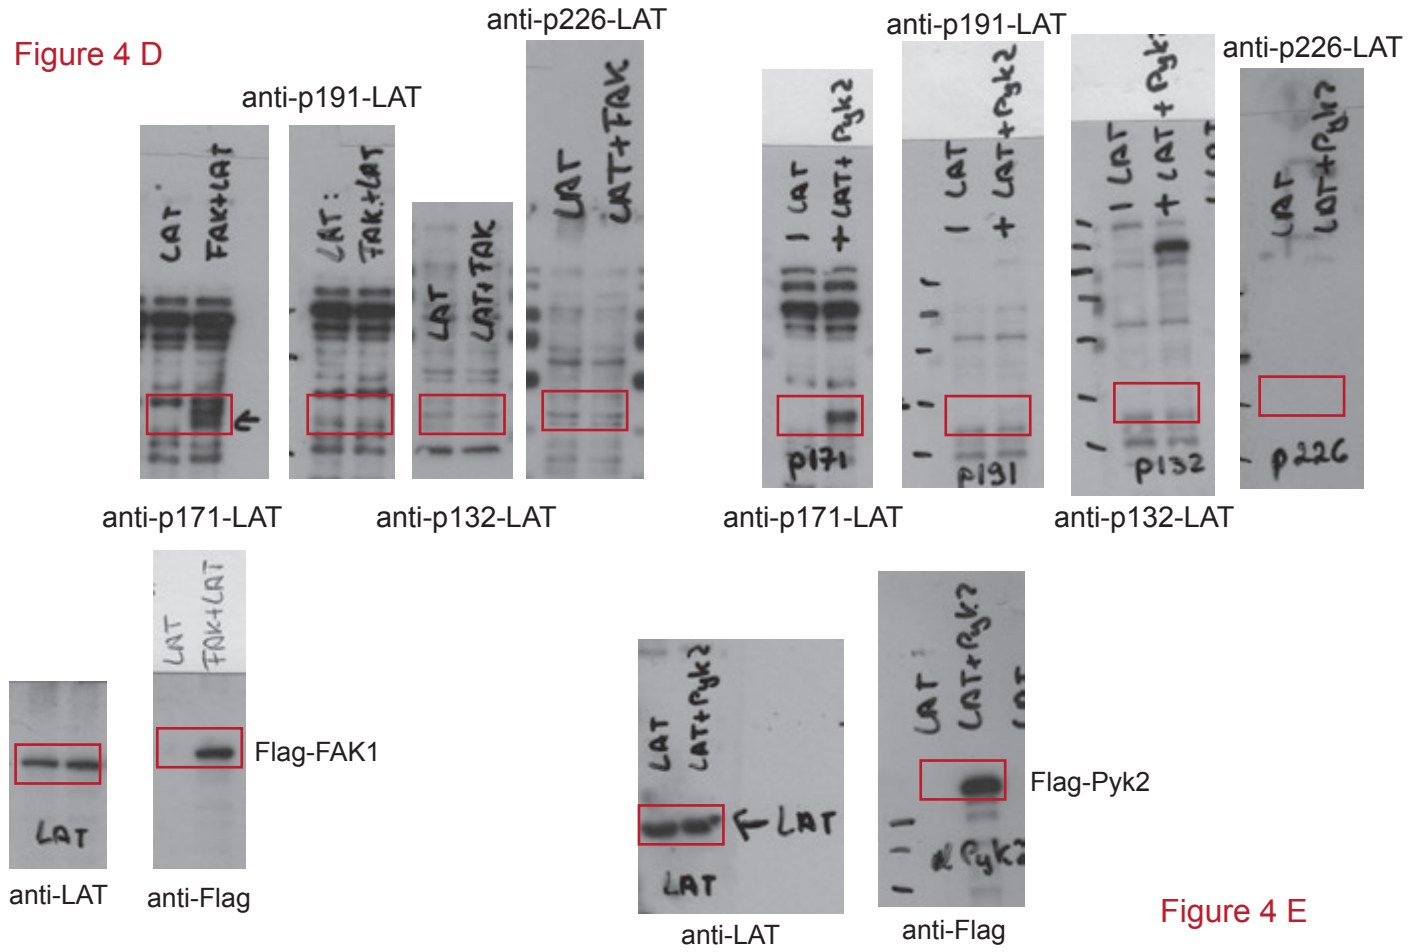

Figure 4 E

Figure 4 F

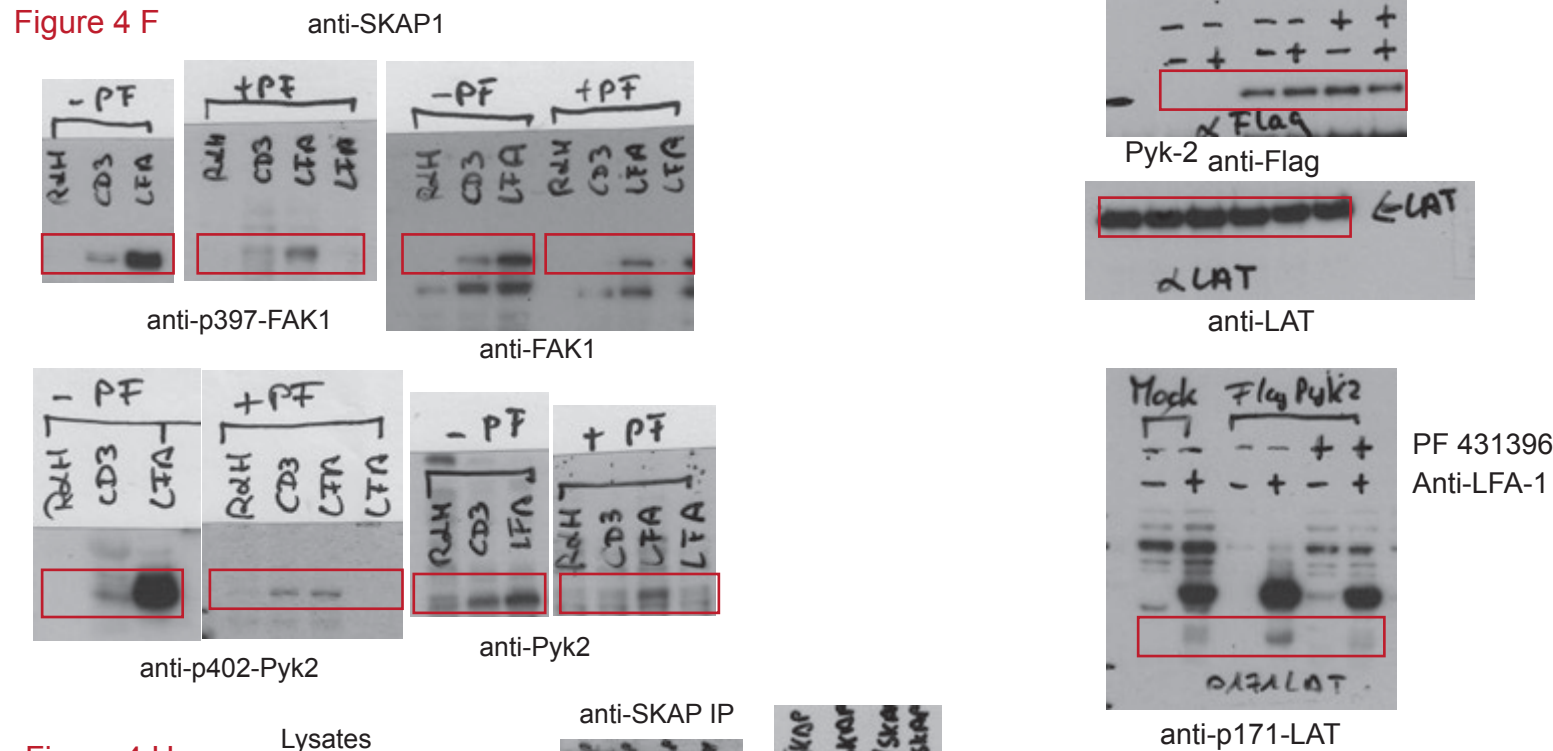

Figure 4 H

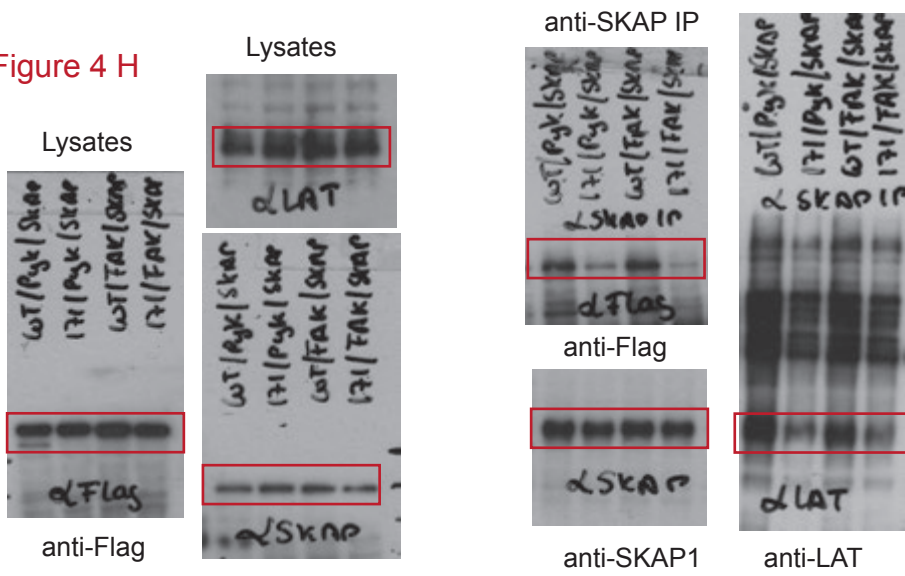

Figure 4 G

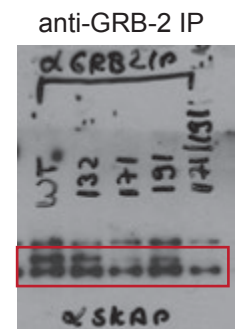



Figure 5 B

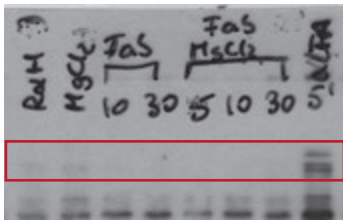

anti-pPyk2

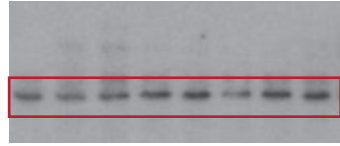

anti-FAK1

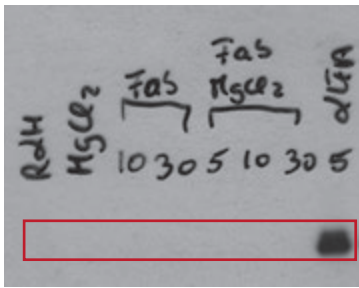

anti-pLAT

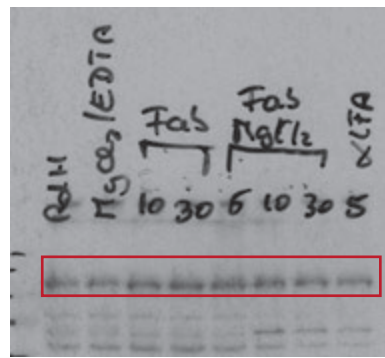

anti-Pyk2

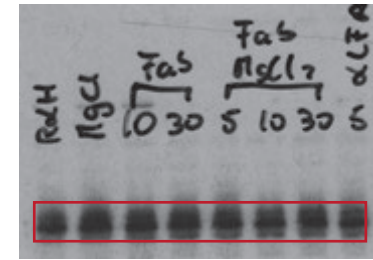

anti-LAT

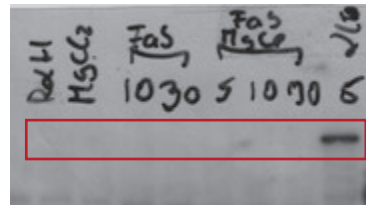

anti-pFAK1

Figure 5 C

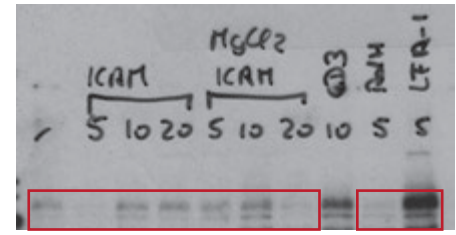

anti-pPyk2

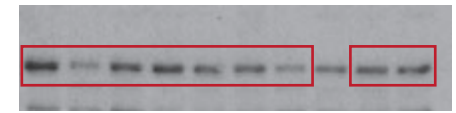

anti-pPyk2

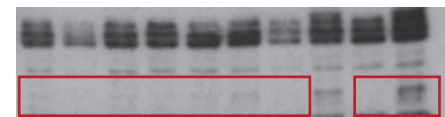

anti-pLAT

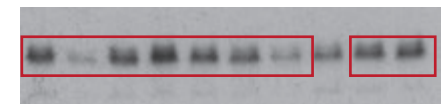

anti-LAT

Figure 6 A

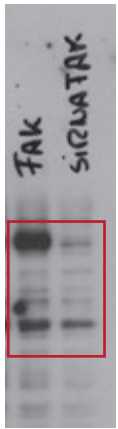

anti-FAK1/β-Actin

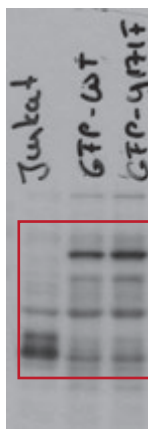

anti-LAT

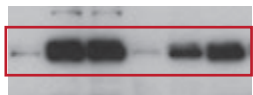

anti-HA

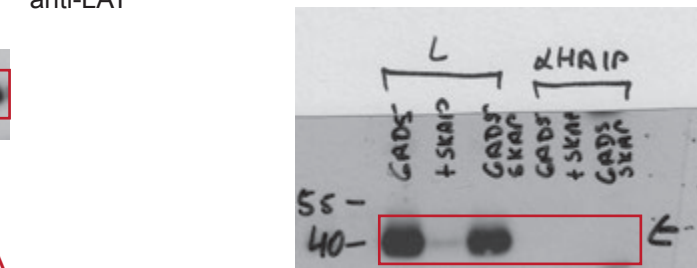

anti-GADS

Suppl. Figure 1A

Figure 7 F

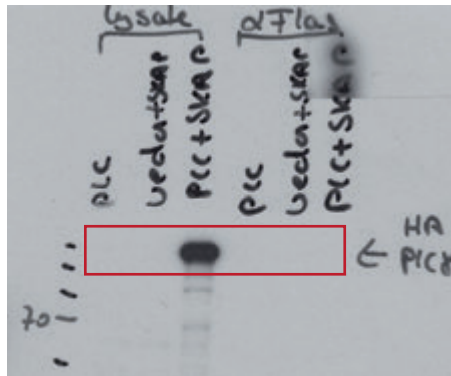

anti-HA

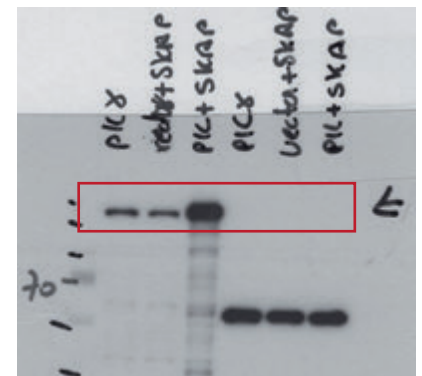

anti-PLCγ1

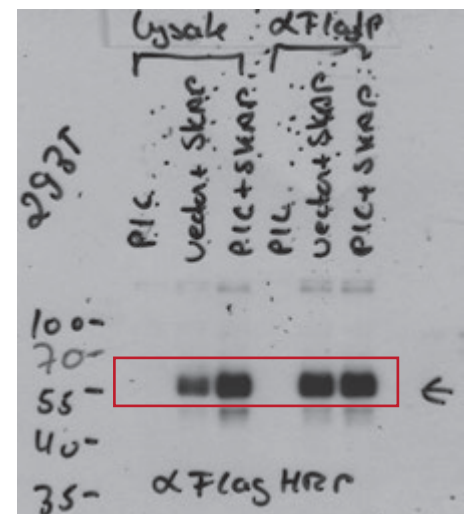

Suppl. Figure 1B
